# Supplementary material for: CoS2@N-doped carbon core–shell nanorod array grown on Ni foam for enhanced electrocatalytic water oxidation
Source: Royal Society of Chemistry journal article supplement (doi:10.1039/d0ta00777c), 2020-01-01
Supplement: d0ta00777c1.pdf [file d0ta00777c1.pdf]

## Supporting Information

### **CoS<sub>2</sub>@N-doped Carbon Core-Shell Nanorod Array Grown on Ni Foam for Enhanced Electrocatalytic Water Oxidation**

Lang Pei,<sup>†\*a</sup> Jiasong Zhong,<sup>†a</sup> Taozhu Li,<sup>b</sup> Wangfeng Bai,<sup>a</sup> Shiting Wu,<sup>a</sup> Yongjun Yuan,<sup>\*a</sup> Yifan Chen,<sup>a</sup> Zhengtao Yu,<sup>b</sup> Shicheng Yan<sup>\*b</sup> and Zhigang Zou<sup>b</sup>

<sup>a</sup> College of Materials and Environmental Engineering, Hangzhou Dianzi University

Hangzhou 310018, P. R. China. \*Email - peilang@hdu.edu.cn; yjyuan@hdu.edu.cn

<sup>b</sup> Eco-materials and Renewable Energy Research Center (ERERC), Collaborative Innovation Center of Advanced Microstructures, College of Engineering and Applied Sciences, Nanjing University, No. 22 Hankou Road, Nanjing, Jiangsu 210093, P. R. China. \*Email - yscfei@nju.edu.cn

† These authors contributed equally to this work.

#### **DFT Calculation.**

The calculations were performed using density functional theory with the Perdew-Burke-Ernzerbof (PBE) form of generalized gradient approximation functional (GGA)<sup>[1]</sup>. The Vienna ab-initio simulation package (VASP) was adopted<sup>[2-5]</sup>. The electron wave functions were expanded using the plane waves with a cutoff energy of 400 eV. The electron occupancies were determined according to the Fermi scheme with the energy smearing of 0.1 eV. The first Brillouin zone was sampled in the Gamma

centered Monkhorst–Pack grid<sup>[6]</sup>. The  $3 \times 3 \times 1$  k-point mesh for the calculations of layered models. To avoid periodic interactions, a vacuum layer as large as 15 Å was used along the c direction normal to the surface. The energy (converged to  $1.0 \times 10^{-6}$  eV/atom) and force (converged to 0.01 eV/Å) were set as the convergence criterion for geometry optimization. To describe the vdw interaction, the dispersion corrections DFT-D3 was employed in this work. The spin polarization was considered in all calculations due to the existence of magnetism atom. To reduce the lattice mismatch between graphene and CoS<sub>2</sub>, one layer and (3×3) supercell of graphene randomly doped with one N atom, and three layers and (2×2) supercell of CoS<sub>2</sub> (111) were chosen to construct the complex structures in our model.

According to the method developed by Nørskov et al<sup>[7]</sup>, the Gibbs free energy change ( $\Delta G_{ads}$ ) for OER steps in this work is calculated as follows:

$$\Delta G_{ads} = \Delta E + \Delta ZPE - T\Delta S$$

where  $\Delta E$  is the energy difference between two intermediates on the catalyst,  $\Delta ZPE$  is the difference in zero-point energy between two intermediates.  $\Delta S$  is the entropy change of two intermediates and T is room temperature (298.15 K). ZPE values could be derived after frequency calculation by:<sup>[8]</sup>

$$ZPE = \frac{1}{2} \sum h\nu_i$$

TS values of adsorbed species were calculated after obtaining the vibrational frequencies:<sup>[9]</sup>

$$TS_v = k_B T \left[ \sum_K \ln \left( \frac{1}{1 - e^{-h\nu/k_B T}} \right) + \sum_K \frac{h\nu}{k_B T} \frac{1}{(e^{h\nu/k_B T} - 1)} \right]$$

where  $k_B$  is the Boltzmann constant,  $\nu$  is vibrational frequency for the intermediates, which are obtained from DFT calculations using VASP.

**Additional Tables and Figures**

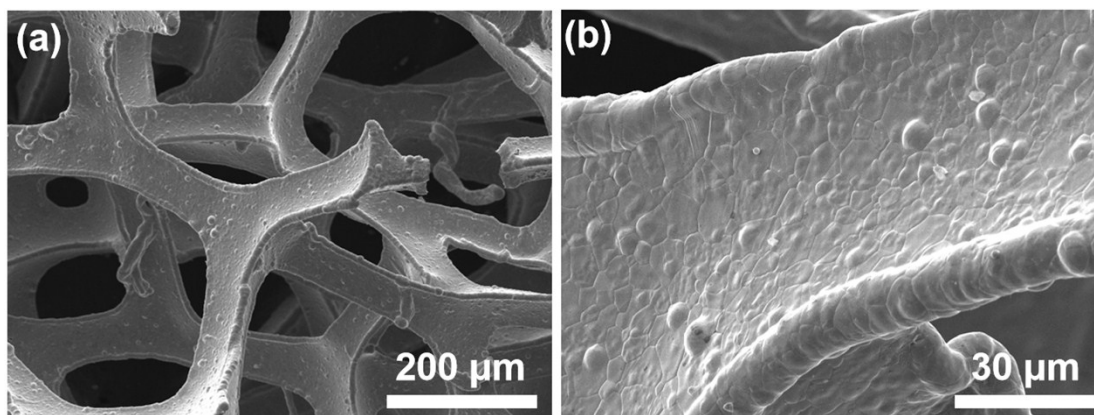

**Fig. S1.** SEM images of the electrode surface of Ni foam after published procedure.

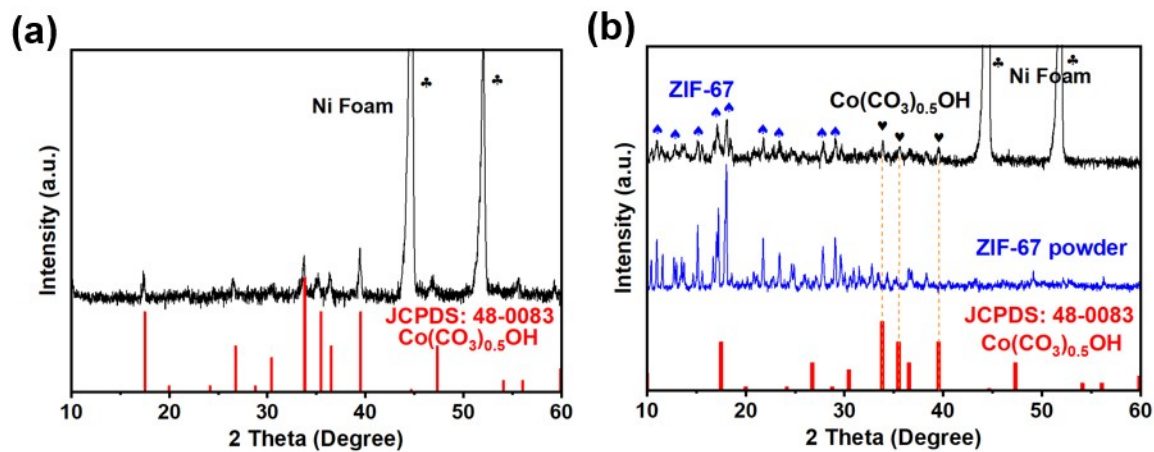

**Fig. S2.** XRD patterns of (a) CCHH@NF and (b) ZIF-67@CCHH@NFs, respectively.

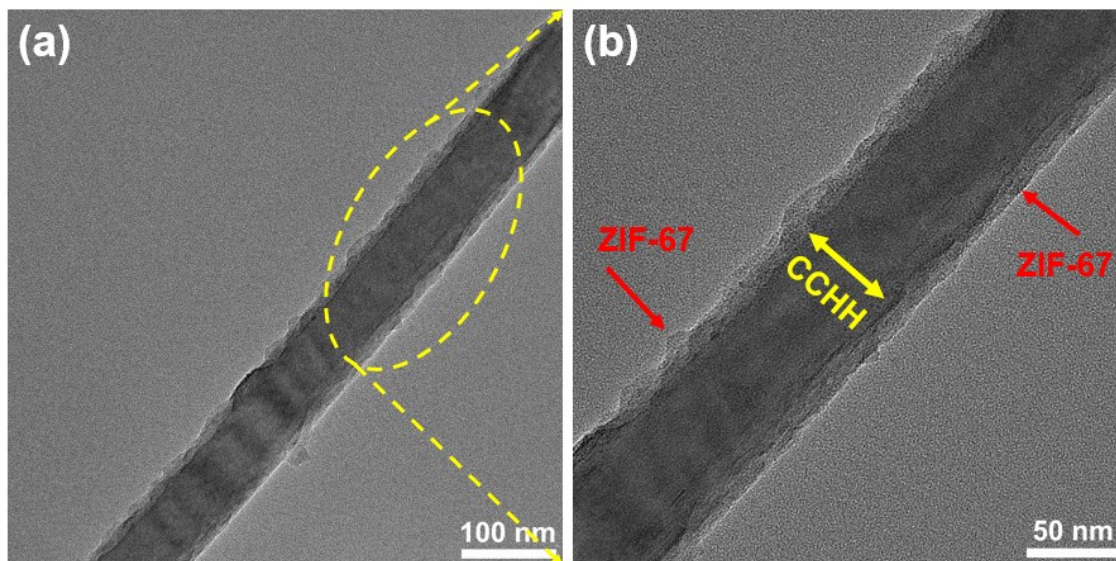

**Fig. S3.** TEM images of the ZIF-67@CCHH.

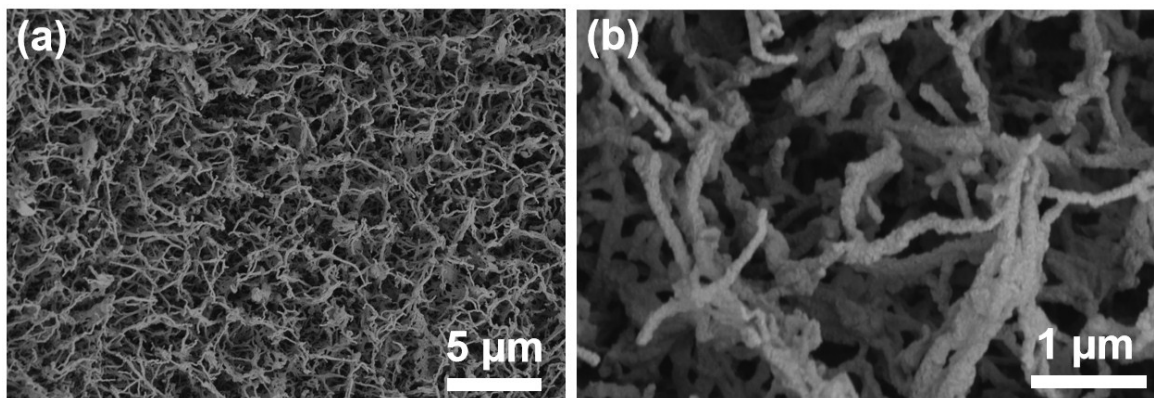

**Fig. S4.** SEM images of the CoS<sub>2</sub>@NF.

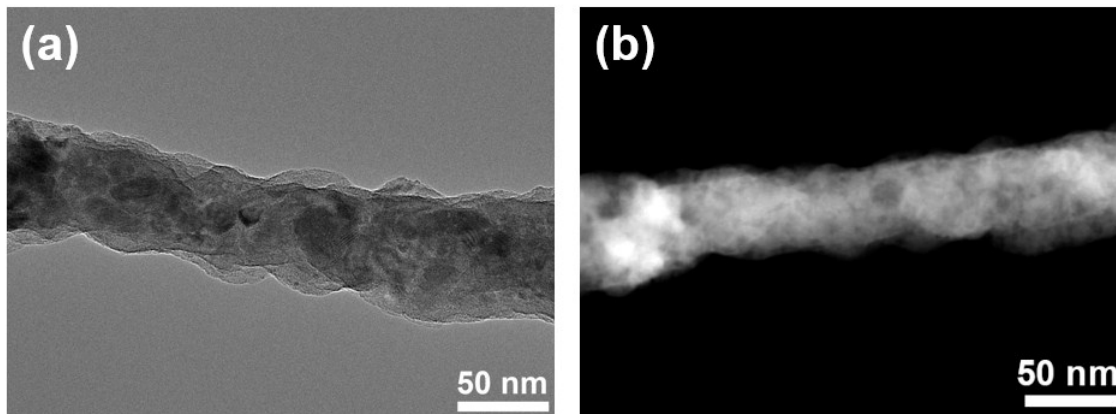

**Fig. S5.** (a) TEM and (b) HAADF-STEM images of  $\text{CoS}_2@\text{NGC}$ .

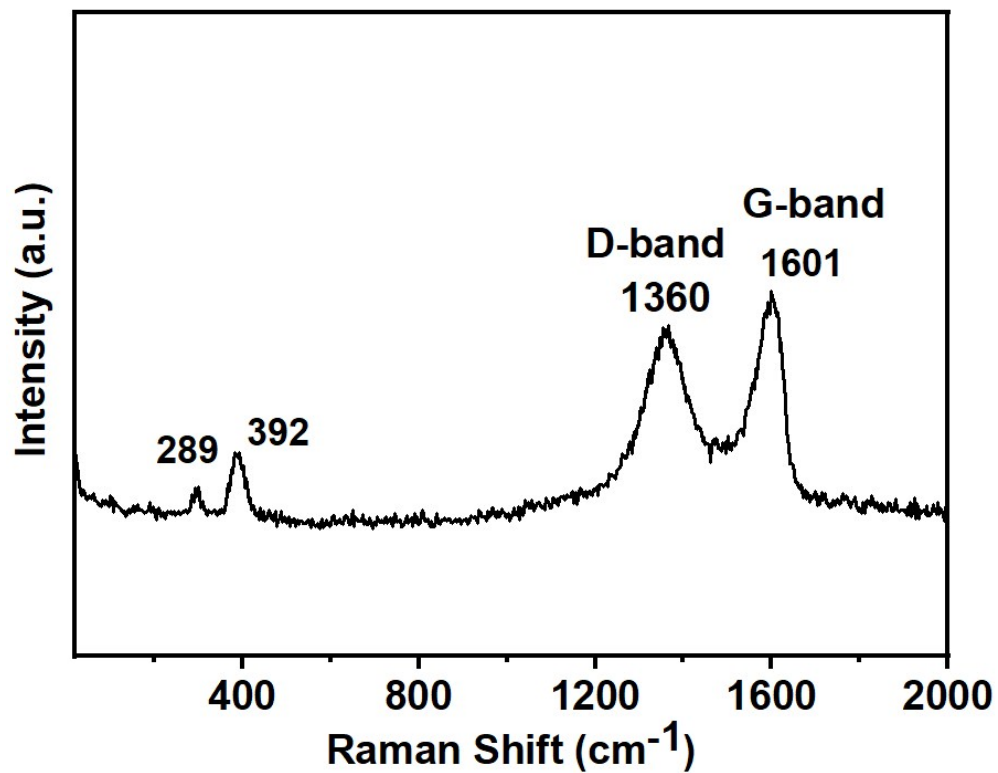

**Fig. S6.** Raman spectra of  $\text{CoS}_2@\text{NGC}$ .

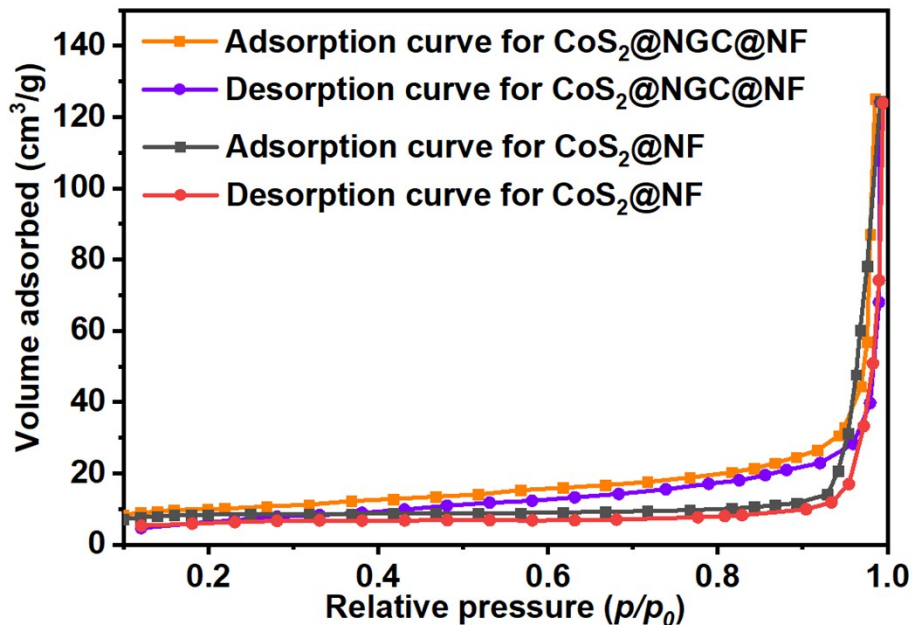

**Fig. S7.** Nitrogen adsorption/desorption isotherms of the  $\text{CoS}_2\text{@NGC@NF}$  and  $\text{CoS}_2\text{@NF}$ , respectively.

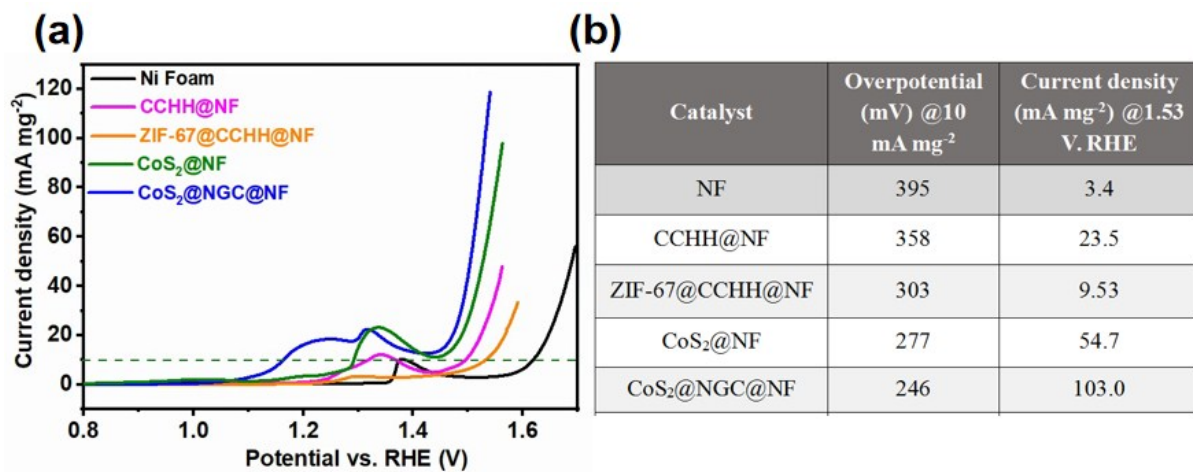

**Fig. S8.** (a) LSV curves (Figure 4a in the main text) normalized by the loading amount, (b) the OER catalytic performance of the different electrodes.



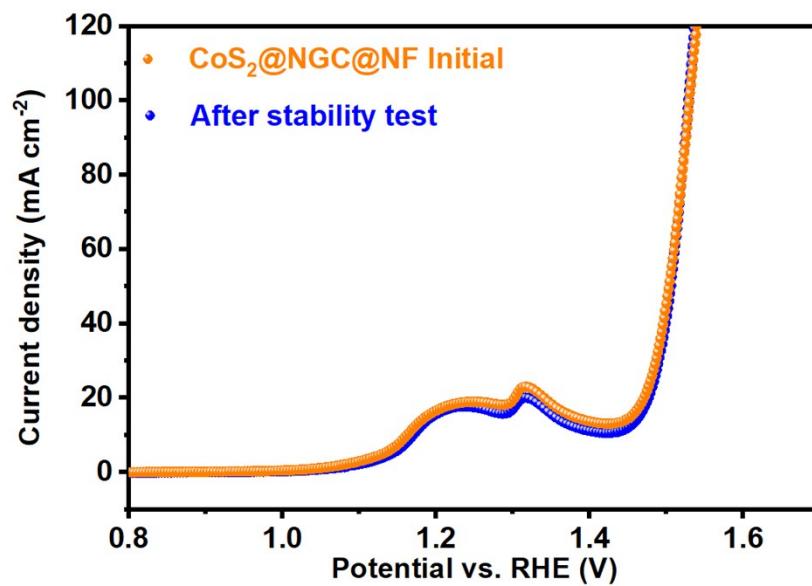

**Fig. S9.** The polarization curves before and after the durability test for 20 h in 1.0 M KOH.

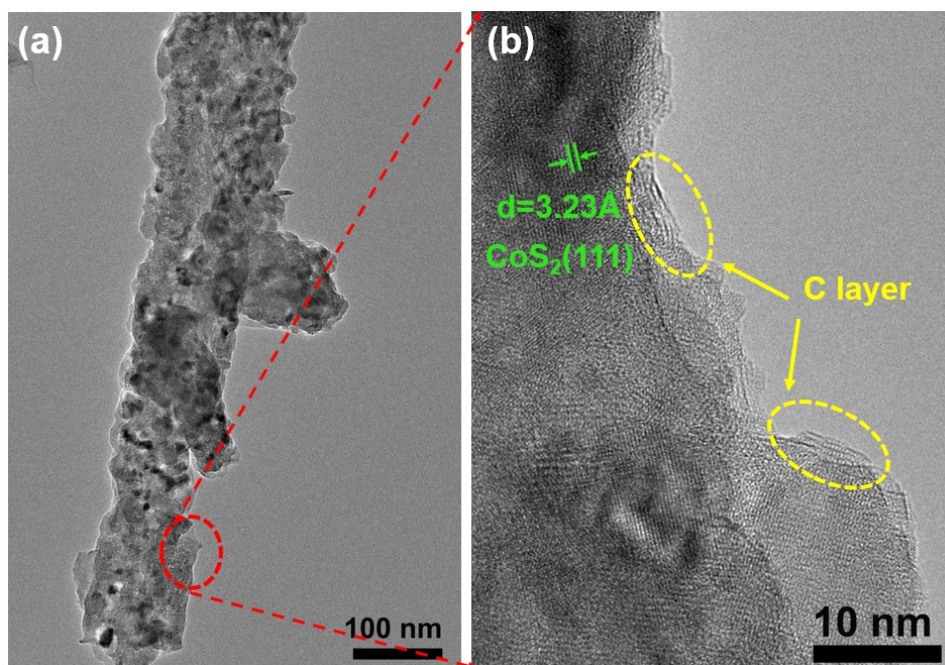

**Fig. S10.** (a,b) TEM image of CoS<sub>2</sub>@NGC@NF after the durability test for 20 h in 1.0 M KOH.



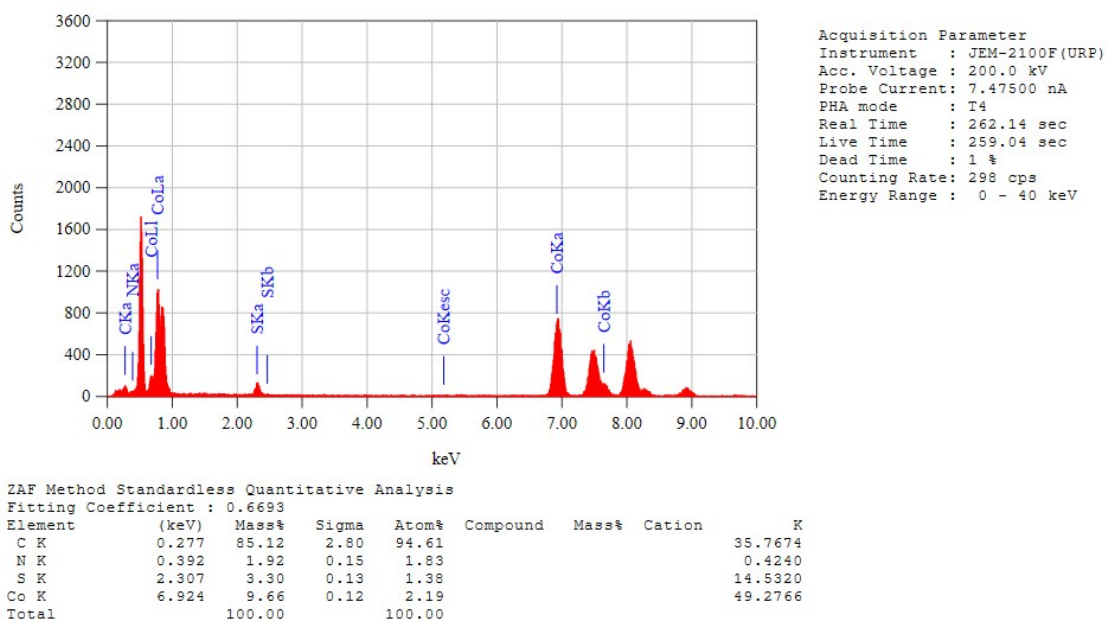

**Fig. S11.** The energy-dispersive X-ray spectrum of CoS<sub>2</sub>@NGC@NF after the durability test for 20 h in 1.0 M KOH.

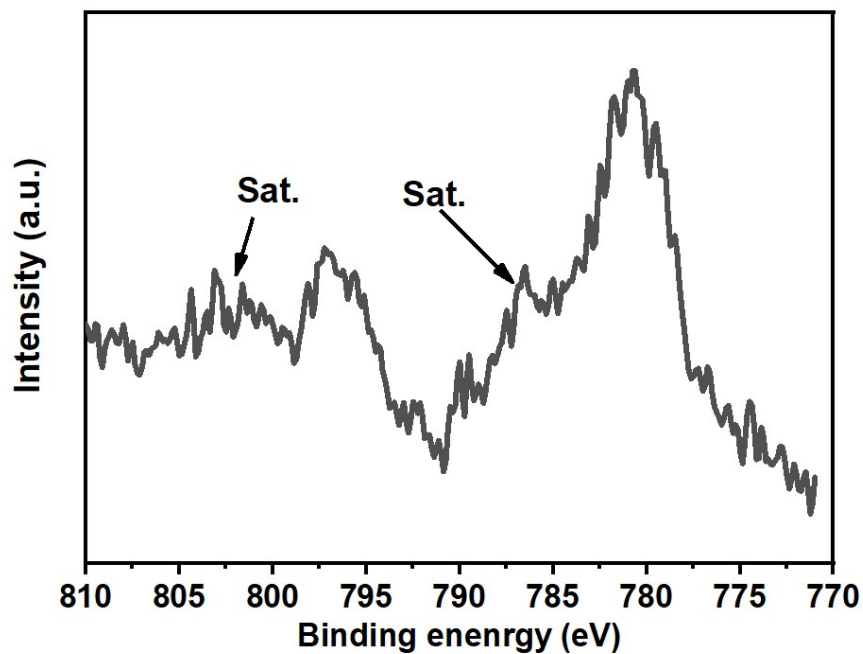

**Fig. S12.** The Co 2p XPS spectrum of CoS<sub>2</sub>@NGC@NF after the durability test for 20 h in 1.0 M KOH. The two typical satellite peaks show decreased signal after durability test, which is likely due to the in situ generated partial Co oxide species (e.g., Co<sub>3</sub>O<sub>4</sub> and CoOOH) during the OER. However, it is difficult to distinguish the typical Co<sup>3+</sup> core level singles from Co<sup>2+</sup> by fitting treatment because they are too close.

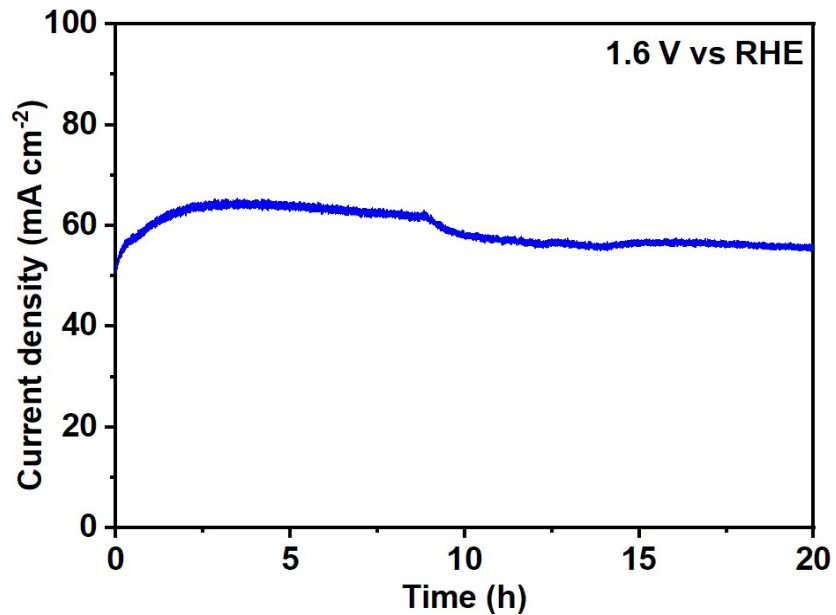

**Fig. S13.** The chronoamperometric durability test for CoS<sub>2</sub>@NF under a constant bias of 1.6 V versus RHE.

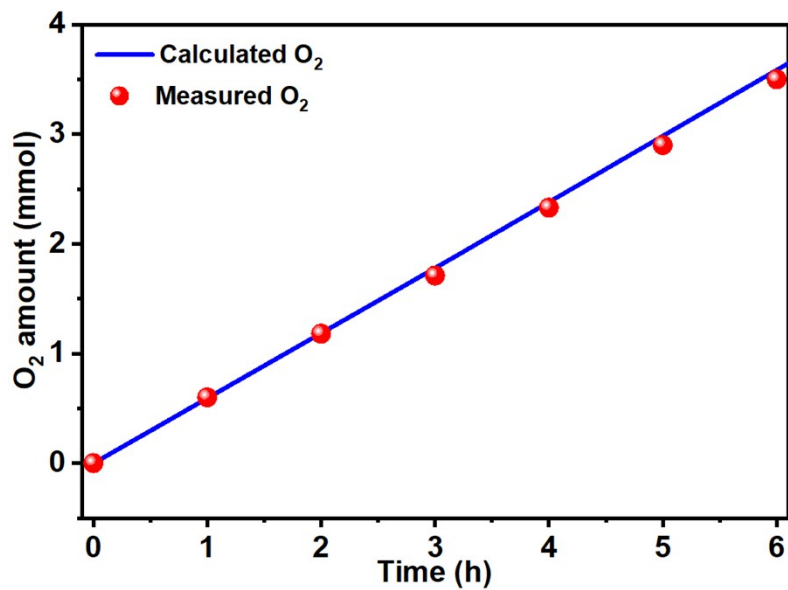

**Fig. S14.** The amount of O<sub>2</sub> (theoretically calculated and experimentally measured at 1.6 V versus RHE) vs. time for oxygen evolution reaction.

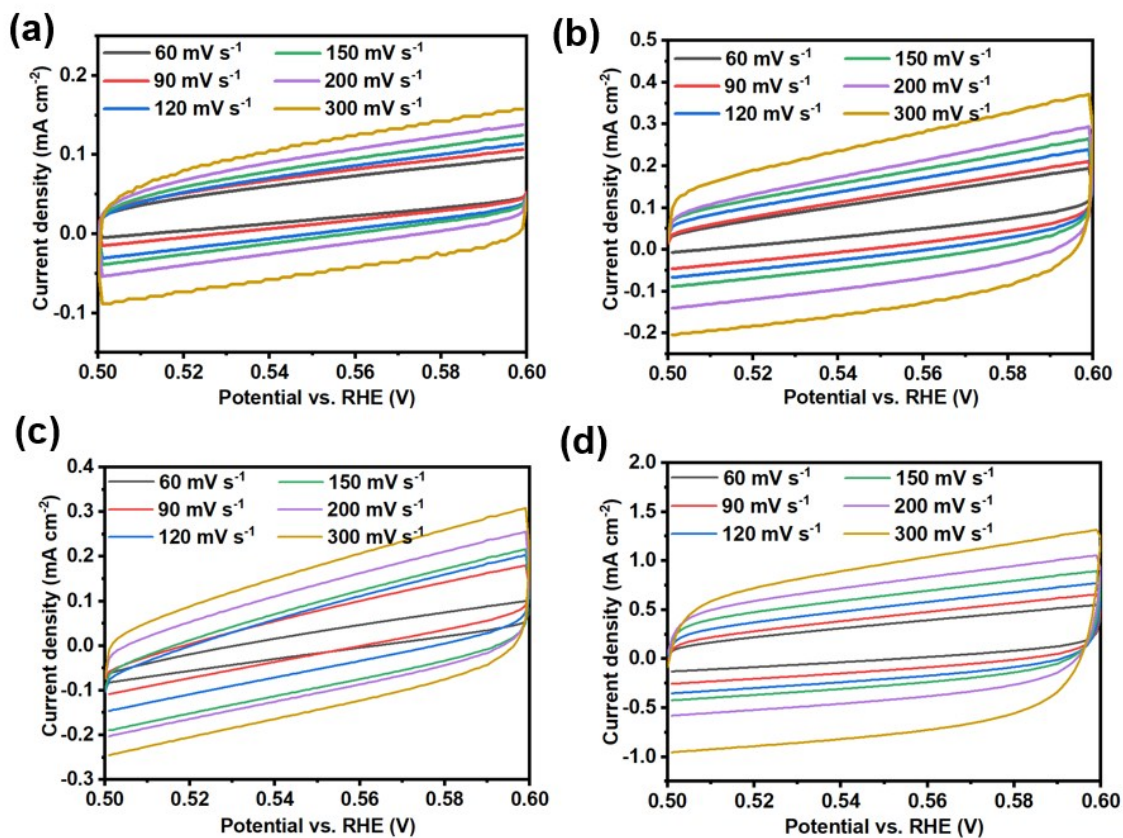

**Fig. S15** Typical cyclic voltammogram shows the capacitive current for the (a) CCHH@NFs, (b) ZIF@CCHH@NFs, (c) CoS<sub>2</sub>@NFs, and CoS<sub>2</sub>@NGC@NF at six different scan rates from 60 to 300 mV/s.

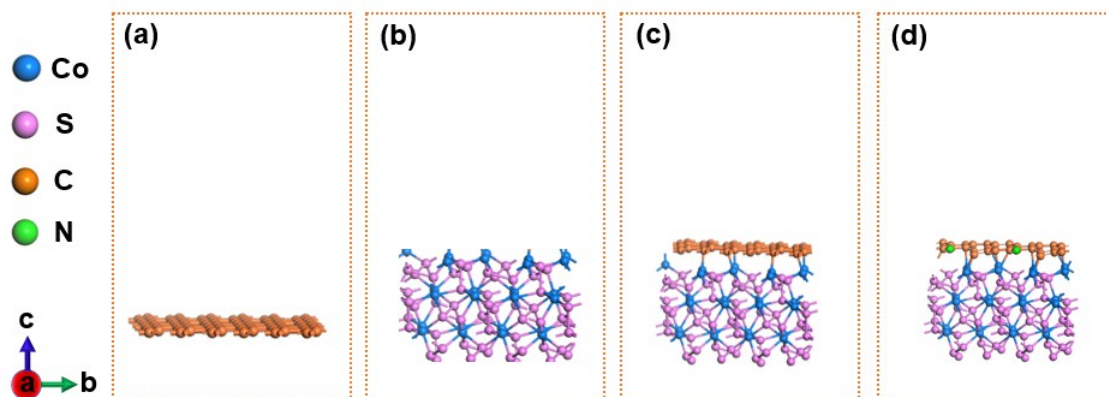

**Fig. S16.** Atomic structure of (a) C, (b) CoS<sub>2</sub>, (c) CoS<sub>2</sub>/C, and (d) CoS<sub>2</sub>/NG for DFT calculations.

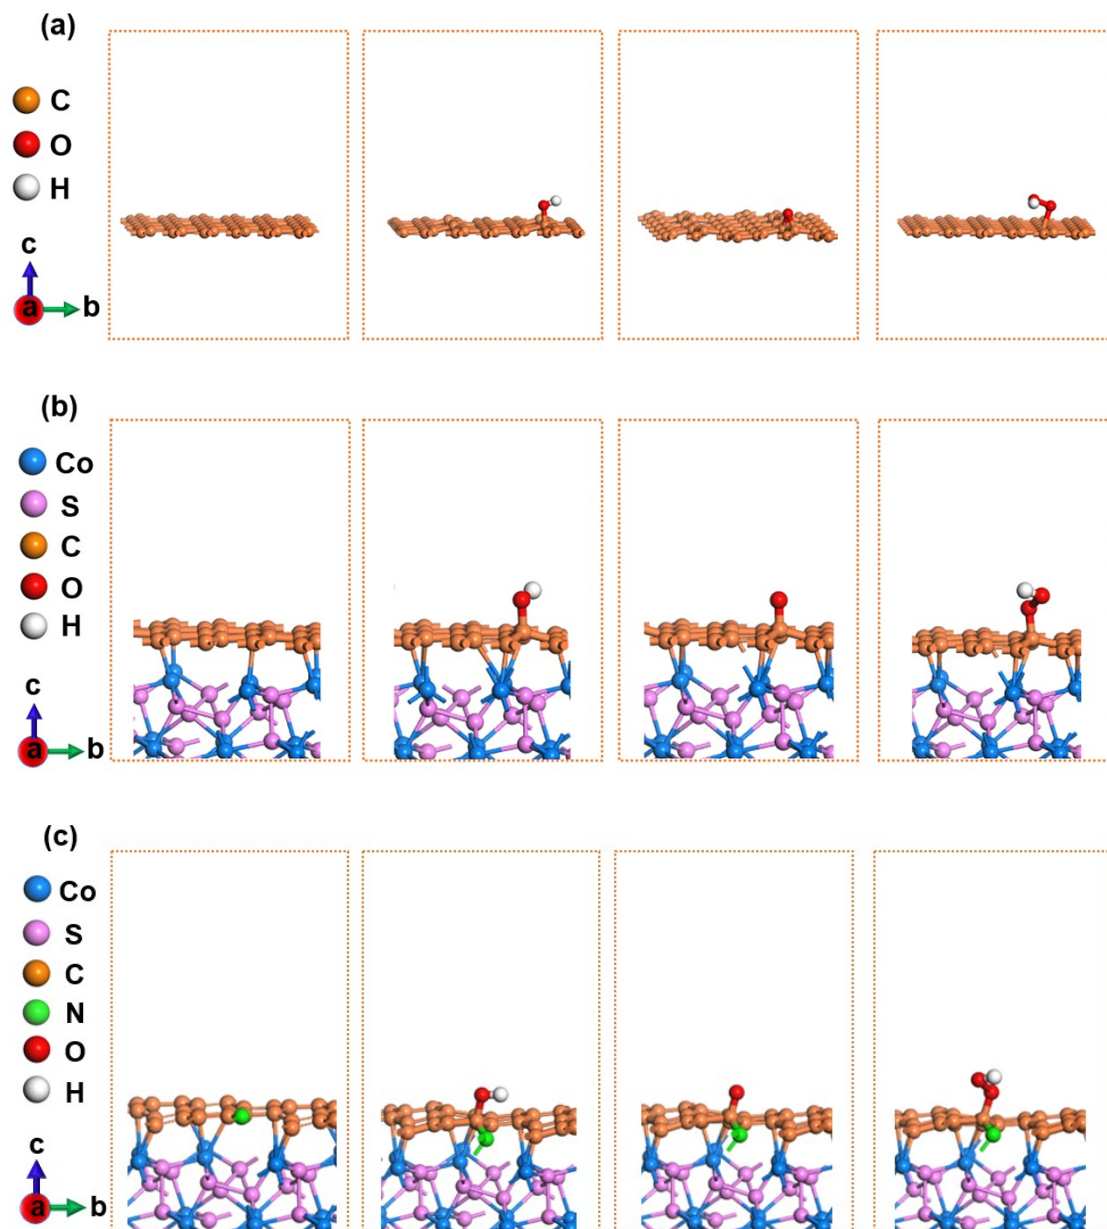

**Fig. S17.** The optimized atomic models for intermediates adsorptions on (a) C, (b) CoS<sub>2</sub>/C, and (c) CoS<sub>2</sub>/NC, respectively.

**Table S1.** Comparison of the OER catalytic performance of the CoS<sub>2</sub>@NGC@NF electrode and the metal-based sulfides reported in literature (in 1.0 M KOH).

| Catalyst                                                   | Overpotential (mV) @10 mA cm <sup>-2</sup> | Tafel slope (mV dec <sup>-1</sup> ) | Stability                           | Substrate     | References                                            |
|------------------------------------------------------------|--------------------------------------------|-------------------------------------|-------------------------------------|---------------|-------------------------------------------------------|
| CoS <sub>2</sub> @NGC                                      | 243                                        | 71                                  | At 65 mA cm <sup>-2</sup> for 20 h  | Ni Foam       | This work                                             |
| Co <sub>3</sub> S <sub>4</sub> /EC-MOF                     | 226                                        | 120                                 | At 1.65 V versus RHE for 20 h       | Carbon Cloth  | <i>Adv. Mater.</i> <b>2019</b> , 31, 1806672          |
| Ni <sub>3</sub> S <sub>4</sub>                             | 257                                        | 67                                  | At 50 mA cm <sup>-2</sup> for 300 h | Ni Foam       | <i>Adv. Funct. Mater.</i> <b>2019</b> , 1900315.      |
| Mo-Co <sub>9</sub> S <sub>8</sub> @C                       | 200                                        | 95.6                                | At 10 mA cm <sup>-2</sup> for 20 h  | Carbon Cloth  | <i>Adv. Energy Mater.</i> <b>2019</b> , 1903137.      |
| Pt-CoS <sub>2</sub> /CC                                    | 300                                        | 58                                  | At 1.53 V versus RHE for 50 h       | Carbon Cloth  | <i>Adv. Energy Mater.</i> <b>2018</b> , 27, 1800935.  |
| Fe-Ni <sub>3</sub> S <sub>2</sub>                          | 214                                        | 42                                  | At 1.5 V versus RHE for 20 h        | Ni Foam       | <i>ACS Catal.</i> <b>2018</b> , 8, 5431.              |
| S, N-CNTs/CoS <sub>2</sub> @Co                             | 340                                        | 76.1                                | –                                   | Glassy Carbon | <i>Science Bulletin</i> <b>2018</b> , 63, 1130.       |
| Co <sub>9</sub> S <sub>8</sub> /NSCNFs                     | 302                                        | 54                                  | At 1.55 V versus RHE for 10 h       | Glassy Carbon | <i>Small</i> <b>2018</b> , 14, 1704035.               |
| CeO <sub>x</sub> /CoS/CC                                   | 232                                        | 50                                  | At ~1.48 V versus RHE for 20 h      | Carbon Cloth  | <i>Angew. Chem., Int. Ed.</i> <b>2018</b> , 57, 8654. |
| Co <sub>9</sub> S <sub>8</sub> @N-doped Carbon             | 302                                        | 67                                  | –                                   | Glassy Carbon | <i>J. Mater. Chem. A</i> <b>2018</b> , 6, 10304       |
| Co <sub>1-x</sub> Ni <sub>x</sub> S <sub>2</sub> -graphene | 330                                        | 47                                  | At 1.6 V versus RHE for 7 h         | Glassy Carbon | <i>ACS Catal.</i> <b>2018</b> , 8, 4091.              |
| Fe-Ni <sub>3</sub> S <sub>2</sub>                          | 214                                        | 42                                  | At 1.5 V versus RHE for 20 h        | Ni Foam       | <i>ACS Catal.</i> <b>2018</b> , 8, 5431.              |
| NiS <sub>2</sub> /CoS <sub>2</sub> -O NWs                  | 235                                        | 31                                  | At 10 mA cm <sup>-2</sup>           | Carbon        | <i>Adv. Mater.</i>                                    |

|                                                  |     |      |                                        |                  |                                                     |
|--------------------------------------------------|-----|------|----------------------------------------|------------------|-----------------------------------------------------|
|                                                  |     |      | for 70 h                               | cloth            | 2017, 29,<br>1704681.                               |
| Cu@CoS <sub>x</sub> /CF                          | 160 | –    | At 100 mA cm <sup>-2</sup><br>for 20 h | Copper<br>foam   | <i>Adv. Mater.</i><br>2017, 29,<br>1606200.         |
| Amorphous CoS <sub>x</sub>                       | 290 | 67   | At 1.56 V versus<br>RHE for 5.56 h     | Glassy<br>Carbon | <i>Angew. Chem.,<br/>Int. Ed.</i> 2017,<br>56, 4858 |
| NiCo <sub>2</sub> S <sub>4</sub>                 | 260 | 40.1 | At 10 mA cm <sup>-2</sup><br>for 50 h  | Ni Foam          | <i>Adv. Funct.<br/>Mater.</i> 2016, 26,<br>4661.    |
| MoS <sub>2</sub> /Ni <sub>3</sub> S <sub>2</sub> | 218 | 88   | At 10 mA cm <sup>-2</sup><br>for 10 h  | Ni Foam          | <i>Angew. Chem.</i><br>2016, 128, 6814.             |

## References

- [1] J. P. Perdew, K. Burke, M. Ernzerhof, *Phys. Rev. Lett.* **1996**, 77, 3865.
- [2] G. Kresse, J. Furthmüller, *Comp. Mater. Sci.* **1996**, 6, 15.
- [3] G. Kresse, J. Hafner, *Phys. Rev. B* **1993**, 47, 558.
- [4] G. Kresse, J. Hafner, *Phys. Rev. B* **1994**, 49, 14251.
- [5] G. Kresse, J. Furthmüller, *Phys. Rev. B* **1996**, 54, 11169.
- [6] H. J. Monkhorst, J. D. Pack, *Phys. Rev. B* **1976**, 13, 5188.
- [7] I. C. Man, H. Y. Su, F. Calle-Vallejo, H. A. Hansen, J. I. Martínez, N. G. Inoglu, J. Kitchin, T. F. Jaramillo, J. K. Nørskov, J. Rossmeisl, *Chem. Cat. Chem.* **2011**, 3, 1159.
- [8] J. K. Nørskov, J. Rossmeisl, A. Logadottir, L. Lindqvist, J. R. Kitchin, T. Bligaard and H. Jónsson, *J. Chem. Phys. B* **2004**, 108, 17886.
- [9] L. I. Bendavid, E. A. Carter, *J. Phys. Chem. C* **2013**, 117, 26048.
